# Supplementary figures and images for: Implication of Paris Agreement in the context of long-term climate mitigation goals
Source: Springer Nature journal article supplement (doi:10.1186/s40064-016-3235-9), 2016-09-19

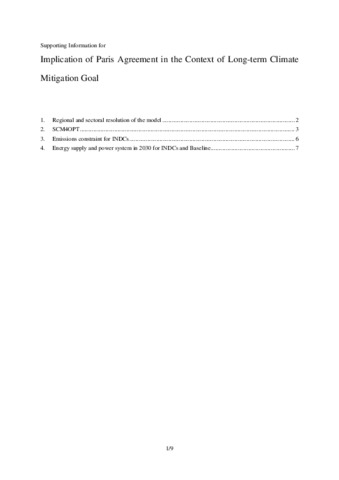

Supplement: MOESM1 [file 40064_2016_3235_MOESM1_ESM.pdf]

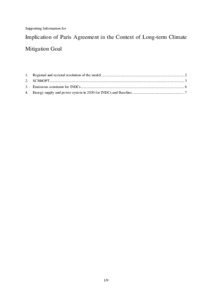

Supplement: MOESM1 [file 40064_2016_3235_MOESM1_ESM.pdf]

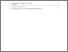

Supplement: MOESM1 [file 40064_2016_3235_MOESM1_ESM.pdf]
